# Supplementary material
Source: publisher figshare collection journal article supplement (https://acs.figshare.com/ndownloader/files/22768703)
Supplement: Supplementary file 1 [file 22768703]

## **Supporting Information**

### **Evidence of an Unusual Poly(A) RNA Signature Detected by High-throughput Chemical Mapping**

*Roger Wellington-Oguri\*, Eli Fisker, Mathew Zada, Michelle Wiley, Jill Townley,  
Eterna Players*

Eterna Massive Open Laboratory, Stanford University, B400 Beckman Center,  
Stanford, CA 94305

\*Corresponding author, email: [omei@stanford.edu](mailto:omei@stanford.edu)

## Table of Contents

|                                                 |           |
|-------------------------------------------------|-----------|
| <b>Data selection details</b>                   | <b>S2</b> |
| <b>Eterna images</b>                            | <b>S3</b> |
| <b>Poly(A) models by players</b>                | <b>S5</b> |
| <b>Eterna players contributing to the paper</b> | <b>S9</b> |

## Data selection details

The strategy for selecting data from RMDB (<https://rmdb.stanford.edu/>)

1. Identify those puzzles that had the most poly(A) sequences relevant to a specific question/hypothesis.
2. If there was more than one RMDB file (each representing one experimental run) containing data for those puzzles, choose the one with the best average signal-to-noise ratio.
3. Include all the relevant sequences in the analysis, irrespective of the signal-to-noise ratio for each sequence.

Figures 1 and 2: The goal was to identify the puzzles that had the most poly(A) subsequences of length 8 or more in the same base positions. Three puzzles stood out from the rest, but one of those (Anaconda About to Poop) contained long stretches of poly(U) as well as poly(A), resulting in ambiguity in which poly(A) subsequences were single stranded. The two remaining puzzles were Triangle of Doom and Eli's Big Hairpin, which occurred in the same data set. The RMDB file with the highest average signal-to-noise ratio was RMDB Accession ID ETERNA\_R00\_0000.

Figure 3: The goal was to find a set of puzzles in one experimental data set with a large number of poly(A) subsequences, with lengths ranging from 5 or 6 to at least 11, regardless of whether they all occurred at the same base positions. Only one experimental data set fit that criteria -- a series of small puzzles that had been measured previously with gel electrophoresis experiments and were used to check the validity of the high throughput experimental process. These small puzzles are identified by their title starting with "Project :", and are included in the data set with RMDB Accession ID ETERNA\_R00\_0000. A special note on these puzzles: in this initial experiment, all puzzles were padded out to a common length using poly(A) on the 5' end of the segment of the RNA that underwent chemical modification. It was observed, however, that the data for the padding molecules were extremely variable, probably because of design-specific interactions with the trailing CAAAAGAAACAACAACAAC sequence. In subsequent experiments, any padding necessitated by the preparation for chemical mapping was removed prior to mapping. For figure 3, the data for the padding sequences were not included.

Figure 4: The goal was to find puzzles with a significant number of subsequences matching the regular expression  $[\wedge A]A\{n,n\}.A\{n,n\}[\wedge A]$  with  $n$  as large as possible. The puzzle Intrinsic – Frequency 8, best satisfied that criteria, with  $n$  equal to 8, with data in RMDB Accession ID ETERNA\_R80\_0000. The signal-to-noise ratio for this data set in general was low, and so sequences with signal-to-noise ratios of less than 1.0 were filtered out. In addition, some sequences had poly(A) stretches long enough that the small sequencer reads made it impossible to assign independent reaction values for each base. These sequences were also filtered out.

All data was generated as part of a large Eterna project called the Cloud Lab, which began in 2013 and was the first high throughput lab, running thousands of sequences in one experiment. The Das lab first ran a pilot round with many puzzles but only a few sequences tested. From then on, each round typically contained 20

puzzles. Each player could submit up to three sequences per puzzle, with those to be synthesized and measured selected by player vote.

All experiments were conducted at the Das Lab following the laboratory protocols described in “Standardization of RNA Chemical Mapping Experiments”, Biochemistry, 2014, 53 (19), 3063-3065.

## Eterna images

Image to the left shows the design sequences, image to the right shows the lab results for the sequence. SHAPE data is displayed in Eterna with the colors blue and yellow. Blue bases indicate pairing and yellow bases are unpaired.

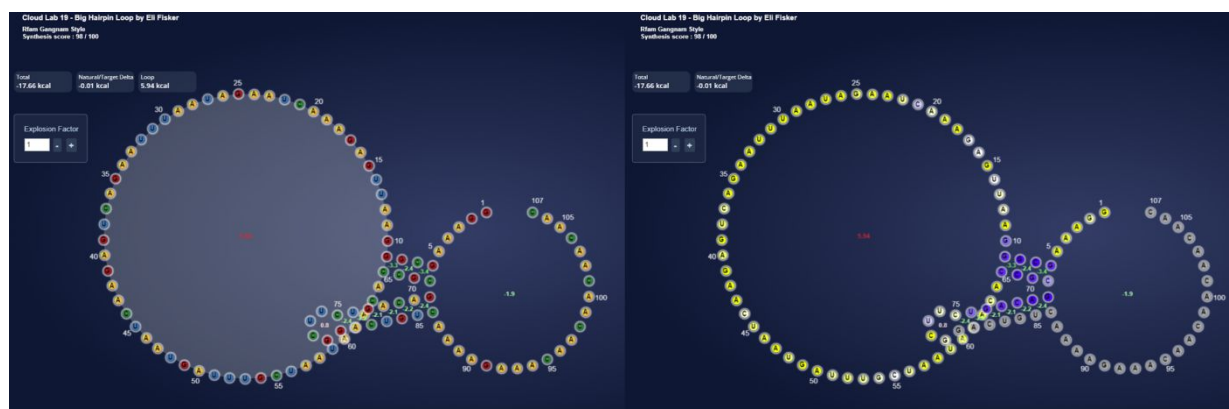

**Figure S1.** Triangle of Doom with mixed bases in loop, no unusual SHAPE data.

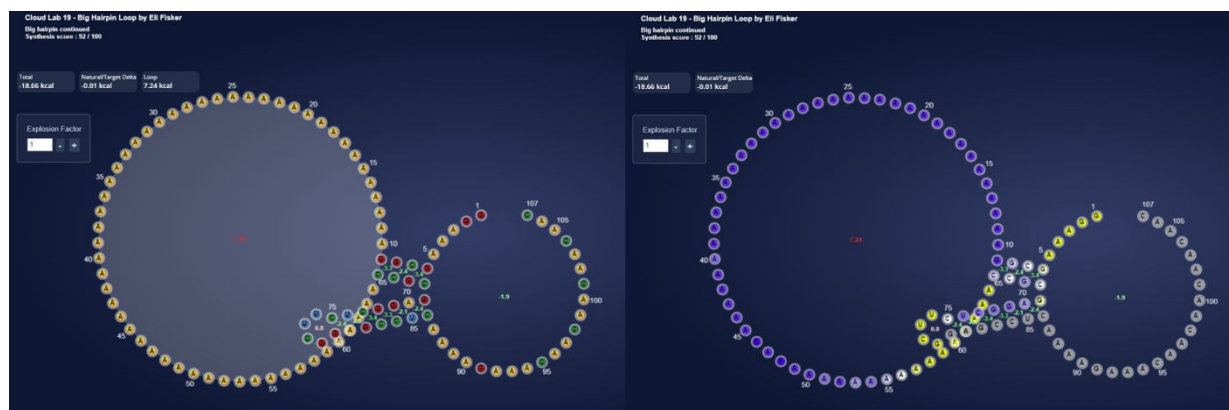

**Figure S2.** Triangle of Doom with poly(A) loop bases displaying unusual SHAPE data.

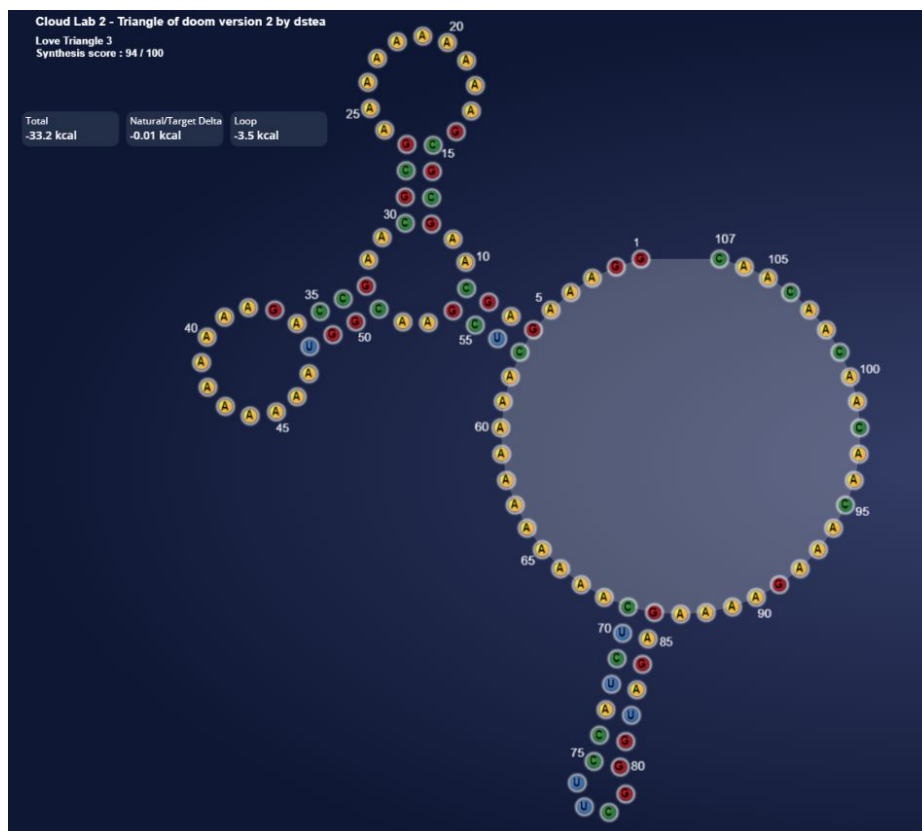

**Figure S3.** Example player solution for Triangle of Doom puzzle.

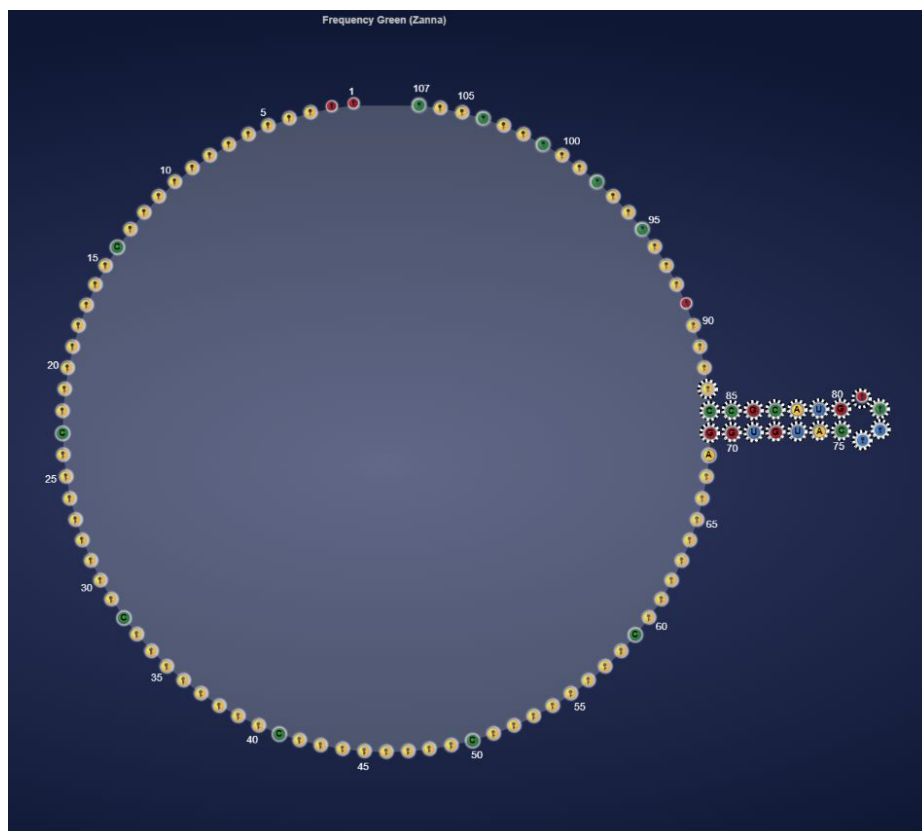

**Figure S4.** Example player solution for Intrinsical - Frequency 8 puzzle.

## Poly(A) models by players

A reviewer suggested we enclose models of what players had speculated a poly(A) structure might look like.

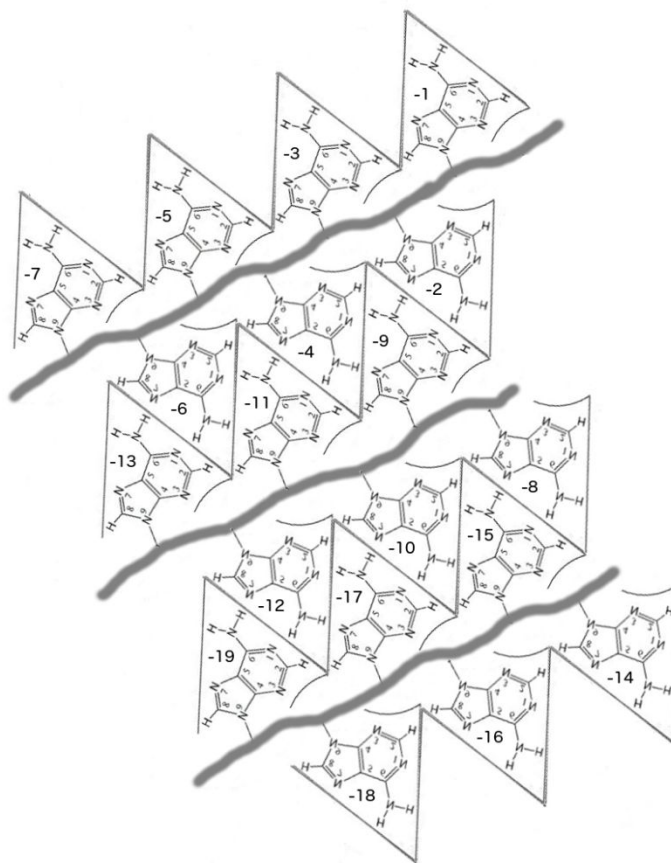

**Figure S5.** A 2016 poly(A) model created by player Omei, displayed flat.

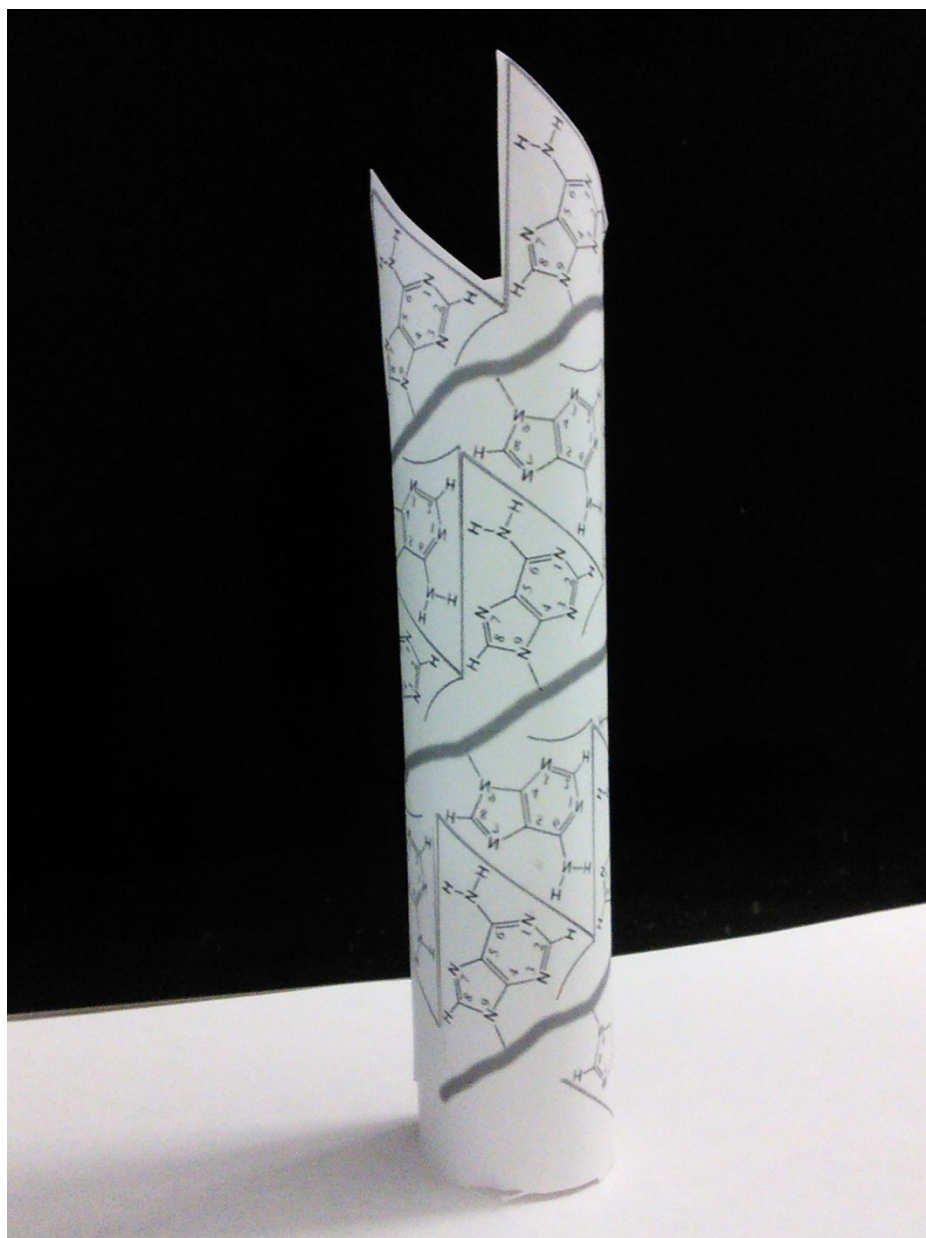

**Figure S6.** A 2016 poly(A) model created by player Omei, rolled up.

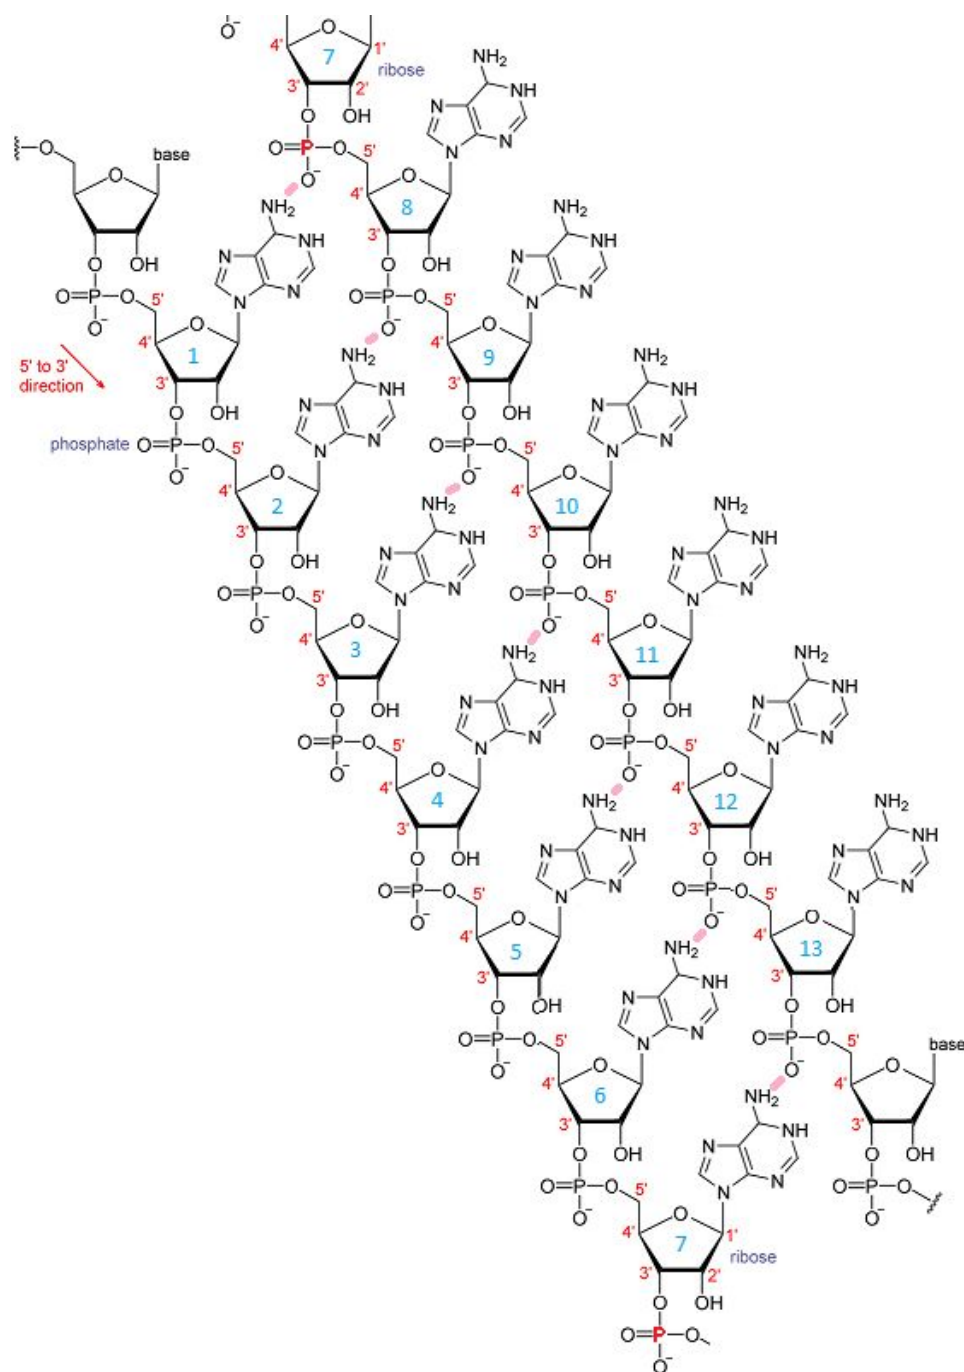

**Figure S7.** A 2018 poly(A) model created by player jandersonlee, displayed flat.

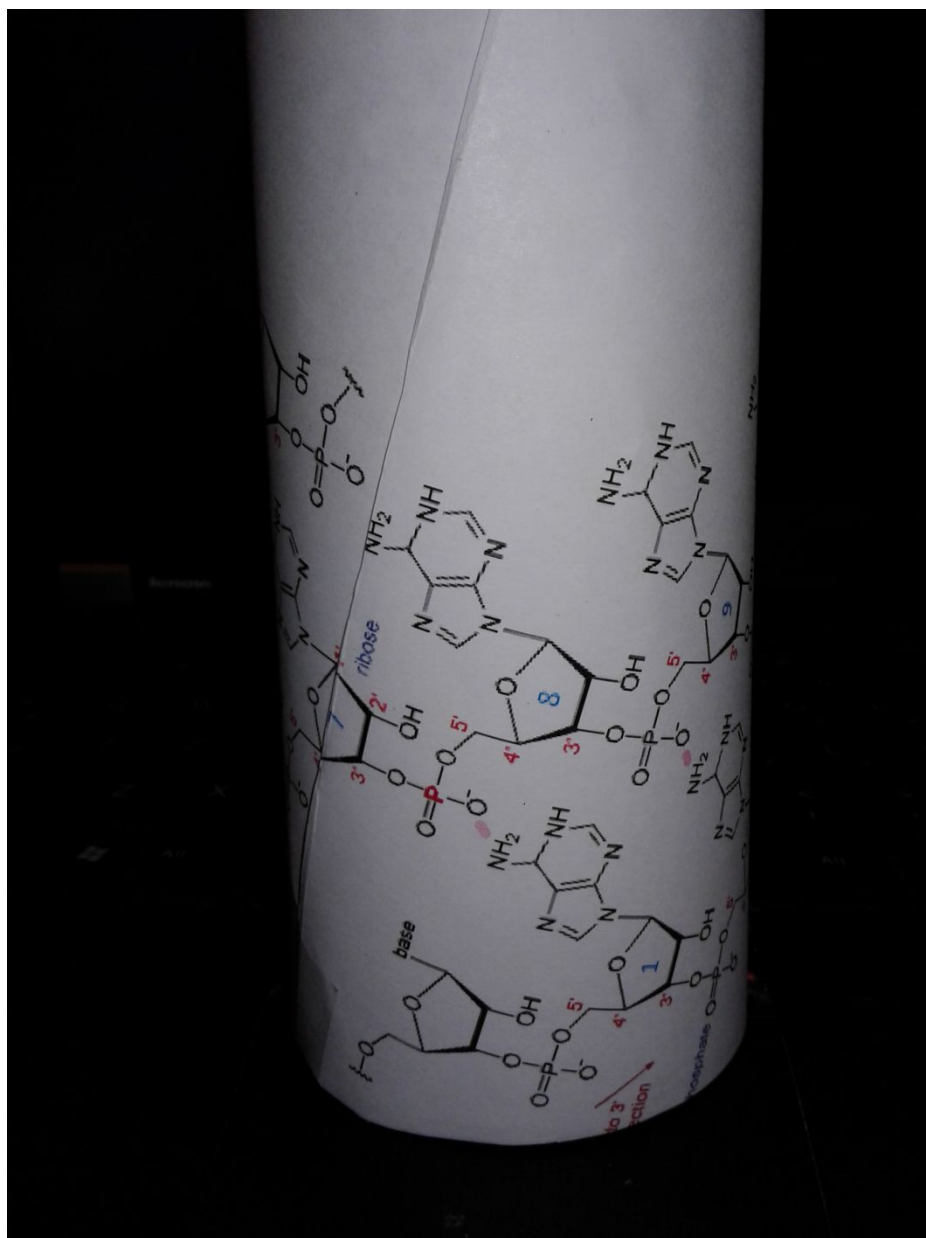

**Figure S8.** A 2018 poly(A) model created by player jandersonlee, rolled up.

## Eterna players contributing to the paper

The following lists the 174 Eterna players (with design sequence counts) who contributed to the paper by submitting sequences for the puzzles used in the analysis.

```
1 555shaun
6 77Tennifry
1 9FireStar
2 aakspuicomterixx
1 aberg011
1 acetom14
3 Akamu
88 akhyatt
1 akros
1 alice21
1 aliciaS
3 AndrewKae
2 andrewsokolow
1 anwyn7
1 arjunadhikari
4 armin
3 arxidia
1 ATPro
2 awegwert
3 bigcheese
25 Billy Reuben
1 bill zhu
10 boganis
1 brambleboy
322 Brouard
7 cataway
4 Chesterfield
1 chrislaser
1 clollin
6 c-quence
1 dlabet1c
3 daffy
2 Daniel B.
3 Darkfire47
2 Darksite
1 daskalska
1 dave2045
5 davidpat
3 Deedie
13 Dennis9600
6 DHammond
3 Dogs_Like_Cake
4 DPope
4 dw.thewilliams33
1 Dysprosium
12 Edward Lane
3 Edward_Lane
1 EFER
100 Eli Fisker
1 EpicShorts
10 eternacac
```

2 evmasuta  
3 faf13  
2 feldbaum  
1 FleurDA  
2 fluffy3  
43 Frater Wroth  
2 freddydog  
12 Freywa  
2 Fullsail  
1 fwizzybee42  
1 Gagarin-Brat  
7 garydfisher  
1 Genghis Jones  
2 Gilden  
2 goerch  
1 hbovis  
16 hoglahoo  
11 Homebrew  
3 hotcreek  
3 huskerdad3  
15 Hyphema  
6 jal  
1 James Francisco  
62 jandersonlee  
9 janelle  
11 janetmason  
1 JCUAce  
1 jeehyung  
9 JerryP70  
23 Jieux  
1 jkoprivsek  
1 jmason  
2 jmf028  
5 jnicol  
3 joeK2\_45  
7 Joshua Weitzman  
12 JR  
5 jruaya  
1 JTBones  
1 katica  
7 kcabral28  
1 kforce214  
3 khar  
1 Kminttech  
2 kneeonlite  
1 Krobar  
1 Kromst  
1 lanceman  
2 LazyBug  
2 LiquidOvar  
15 lroppy  
1 madmax337  
5 Malcolm  
226 mat747  
1 matosfran  
2 Matt Indykiewicz  
7 Max Goff

- 1 Mearth
- 6 Meechl
- 45 merryskies
  - 1 mistressgieddbrytta
  - 2 naprat
- 15 nascarnut
  - 1 NE5480
  - 3 necet
  - 6 nelulon
  - 1 Nick Keller
  - 1 Noah Katcher
  - 1 nodnerb93
  - 2 okrazerback
  - 6 Omei
- 327 oolong
  - 1 paloma
- 34 paramodic
  - 1 Pegasus1207
  - 3 Peter Stampfli
  - 1 player4596
  - 1 psychemist
  - 1 ptrw
  - 1 qball
- 126 Quasispecies
  - 4 Quxwozing
  - 1 RachelRose
  - 6 randl
  - 3 redsoxwy
  - 5 RedSpah
  - 1 rhys
- 12 ribonucleic
  - 2 rlmarchal
  - 6 rnjensen45
- 12 robu-san
  - 1 Sadler
  - 1 shaheenj
  - 1 Sherlock
  - 4 SpaceFolder
  - 1 sriopelle
- 12 starryjess
  - 3 steven123505
- 52 stevetclark
  - 1 Stormy
  - 9 Tesla'sDisciple
  - 1 TheBoogeyMan247
  - 1 The Dev1
  - 5 theravin
  - 1 TheSkedaddling
  - 1 timl
  - 1 tjlambo
  - 2 TL-TBO
  - 1 tmhsu
  - 3 tomoedachii
  - 2 TreyBrown
  - 2 tryoon93
  - 2 UN CZack
  - 1 ValentinPerm

13 ViennaUCT  
1 Vladimir Semenov  
17 wateronthemoon  
8 wilf  
17 wisdave  
1 wtoy  
1 xenosapien  
1 xiaofanjin  
3 Zanna
